# Supplementary material for: Facile hydrothermal synthesis of AgPb10LaTe12 materials: controlled synthesis, growth mechanism and shape-dependent electrical transportation properties
Source: Royal Society of Chemistry journal article supplement (doi:10.1039/c2ce25512j), 2012-01-01
Supplement: c2ce25512j.pdf [file c2ce25512j.pdf]

## Supplementary Information

**Table S1** The atomic ratios for  $\text{AgPb}_{10}\text{LaTe}_{12}$  measured by EDS and ICP-AES techniques

|         | Ag  | Pb   | La  | Te   | composition                                                     |
|---------|-----|------|-----|------|-----------------------------------------------------------------|
| EDS     | 3   | 31   | 6   | 33   | $\text{Ag}_{0.98}\text{Pb}_{10}\text{La}_{1.9}\text{Te}_{10.6}$ |
| ICP-AES | 2.4 | 22.1 | 3.2 | 24.6 | $\text{Ag}_{1.1}\text{Pb}_{10}\text{La}_{1.45}\text{Te}_{11.2}$ |

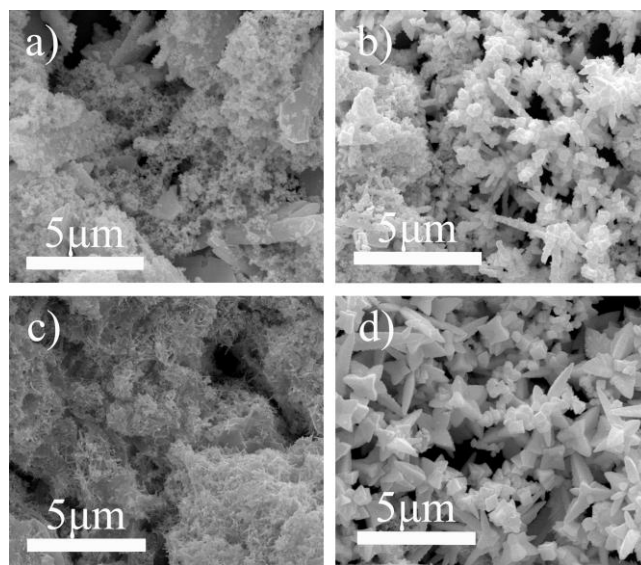

**Fig. S1** SEM images of  $\text{AgPb}_{10}\text{LaTe}_{12}$  samples synthesized with the solvent of water and different amount of KOH a) 0 g, b) 0.5 g, c) 1.5g, d) 2.0 g in the presence of PVP

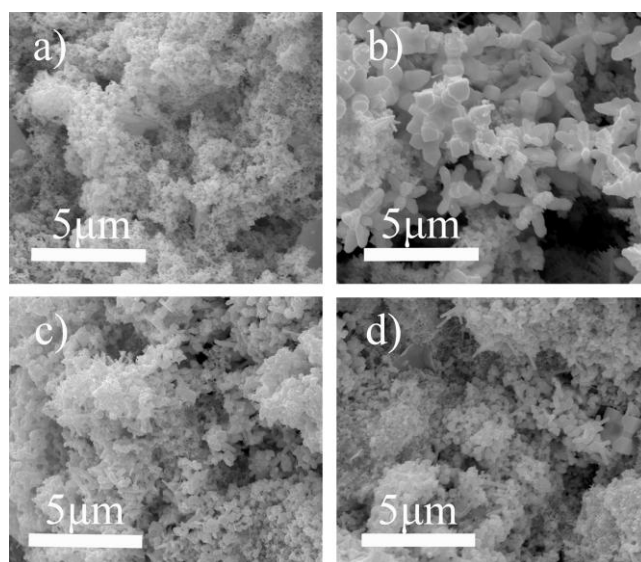

**Fig. S2** SEM images of  $\text{AgPb}_{10}\text{LaTe}_{12}$  samples synthesized with the solvent of water and different amount of KOH a) 0 g, b) 0.5 g, c) 1.5g, d) 2.0 g in the absence of PVP

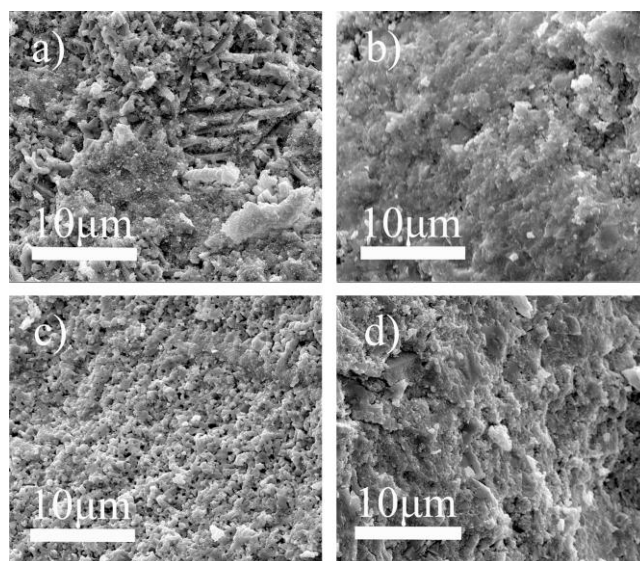

**Fig. S3** SEM images of the cross section of  $\text{AgPb}_{10}\text{LaTe}_{12}$  bars with different morphologies a) rod-like particles, b) cubic particles, c) flower-like particles with eight serrated petals, d) flower-like particles with eight smooth petals
